# Supplementary material for: Authoritative subspecies diagnosis tool for European honey bees based on ancestry informative SNPs
Source: PubMed Central journal article supplement (PMC7860026; doi:10.1186/s12864-021-07379-7), 2021-02-03
Supplement: 12864_2021_7379_MOESM4_ESM.pdf [file 12864_2021_7379_MOESM4_ESM.pdf]

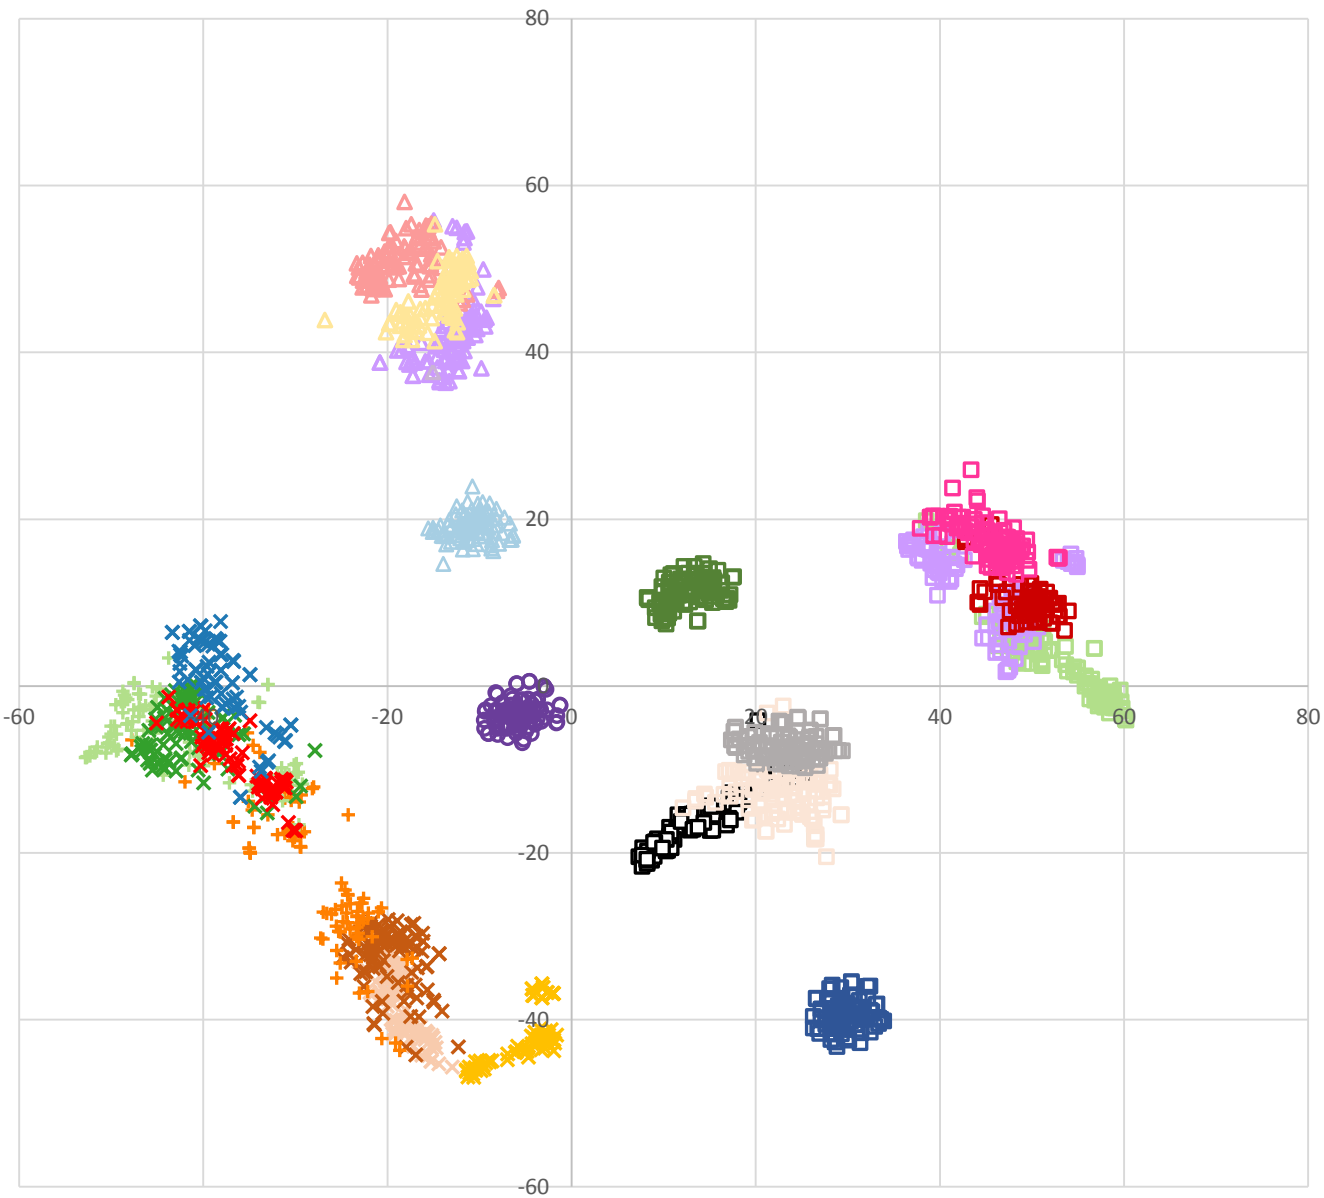

- O - lineage**
- ▲ ana\_tur
  - ▲ rem\_arm
  - ▲ cau\_tur\_geo
  - ▲ cyp\_cyp

- C - lineage**
- × car\_svn\_hrv
  - × car\_aut\_hun
  - × lig\_ita
  - + carp\_rou\_mda
  - + rod\_bgr
  - × mac\_mkd\_grc
  - × cec\_grc
  - × ada\_grc

- M - lineage**
- ibe\_esp\_eus
  - ibe\_esp\_north
  - ibe\_esp\_south
  - ibe\_esp\_west\_prt
  - mel\_dnk
  - mel\_irl
  - mel\_rus
  - mel\_che
  - mel\_imn

○ rut\_mlt (A - lineage)
